# Supplementary material
Source: PubMed Central journal article supplement (PMC5484046)
Supplement: NIHMS869944-supplement-1.pdf [file NIHMS869944-supplement-1.pdf]

**Dnmt1 Day 4**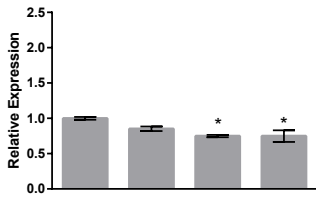**Dnmt1 Day 8**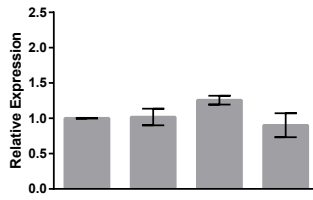**Dnmt1 Day 14**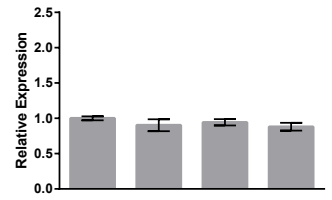**Dnmt3b Day 4**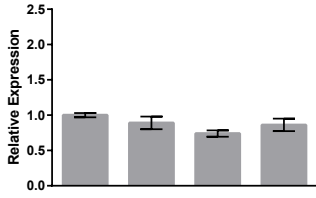**Dnmt3b Day 8**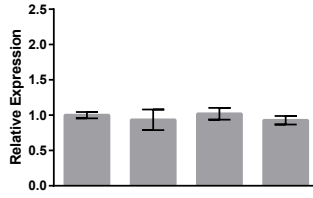**Dnmt3b Day 14**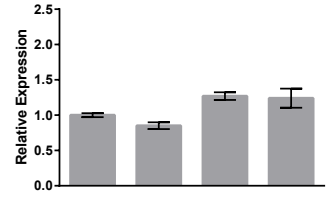**Np95 Day 4**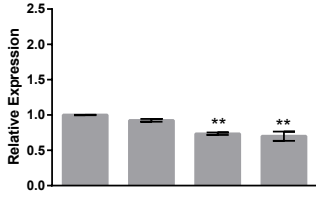**Np95 Day 8**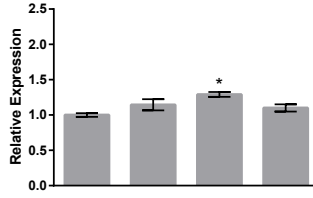**Np95 Day 14**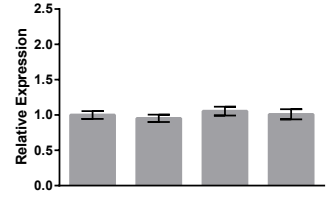**Eed Day 4**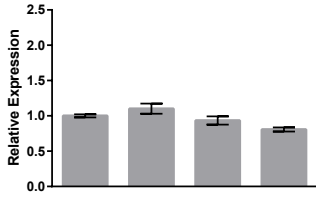**Eed Day 8**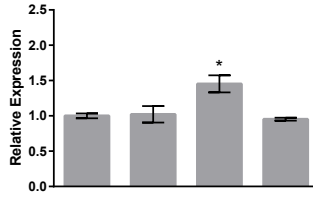**Eed Day 14**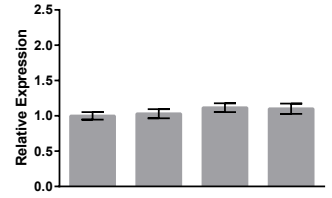**Ezh2 Day 4**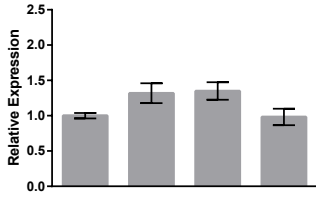**Ezh2 Day 8**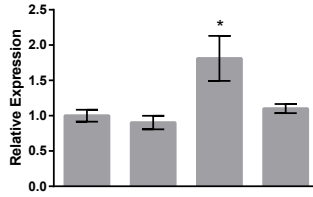**Ezh2 Day 14**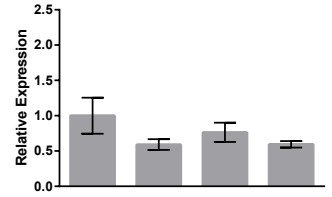**Ehmt2 Day 4**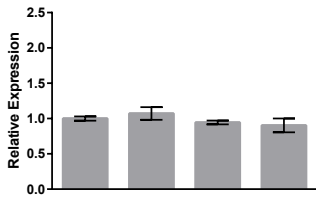**Ehmt2 Day 8**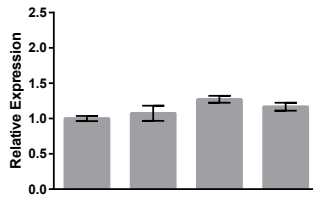**Ehmt2 Day 14**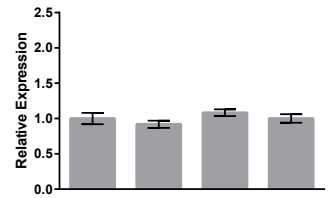**Setdb1 Day 4**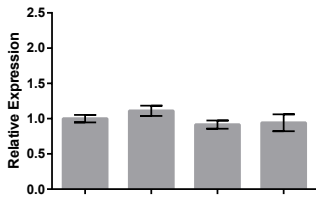**Setdb1 Day 8**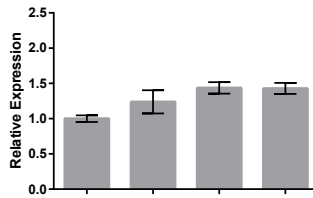**Setdb1 Day 14**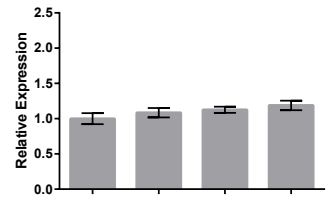

Control  
80 mg/dL EtOH  
160 mg/dL EtOH  
240 mg/dL EtOH

Control  
80 mg/dL EtOH  
160 mg/dL EtOH  
240 mg/dL EtOH

Control  
80 mg/dL EtOH  
160 mg/dL EtOH  
240 mg/dL EtOH
