# Supplementary material
Source: PubMed Central journal article supplement (PMC5484046)

**Kdm3a Day 4**

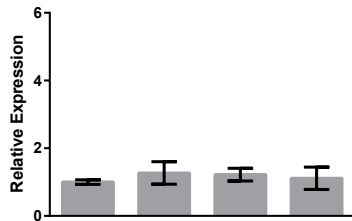

**Kdm3a Day 8**

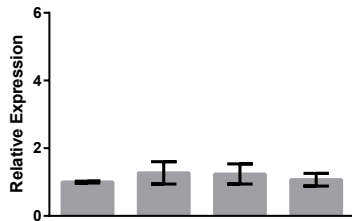

**Kdm3a Day 14**

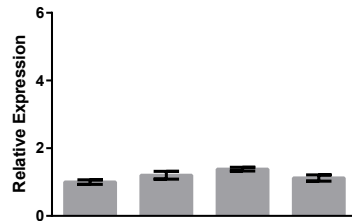

**Kdm4c Day 4**

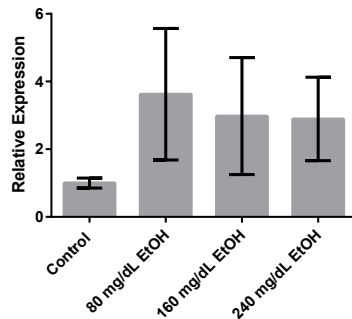

**Kdm4c Day 8**

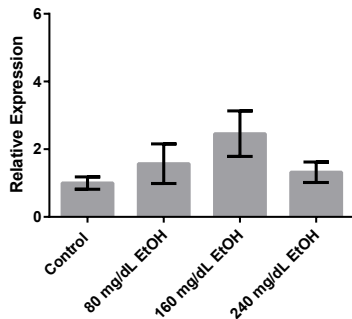

**Kdm4c Day 14**

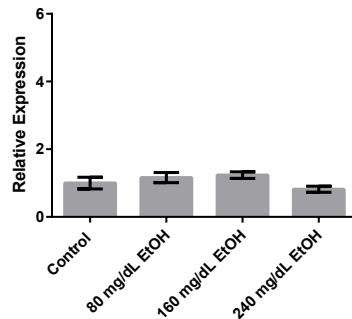

Supplement: NIHMS869944-supplement-2.pdf [file NIHMS869944-supplement-2.pdf]
